# Supplementary material
Source: publisher figshare collection journal article supplement (https://acs.figshare.com/ndownloader/files/3955198)
Supplement: Supplementary file 1 [file 3955198]

## SUPPORTING MATERIAL

### Probing Plasmonic Effects on the Raman Activity of Ag Nanoparticle-Based Nanostructures through Terphenyl Diisocyanide Adsorption

Giorgio Baraldi,<sup>†</sup> Eduardo Lopez-Tobar,<sup>‡</sup> Kenji Hara,<sup>§</sup> Santiago Sanchez-Cortes,<sup>‡</sup> and José Gonzalo<sup>\*,†</sup>.

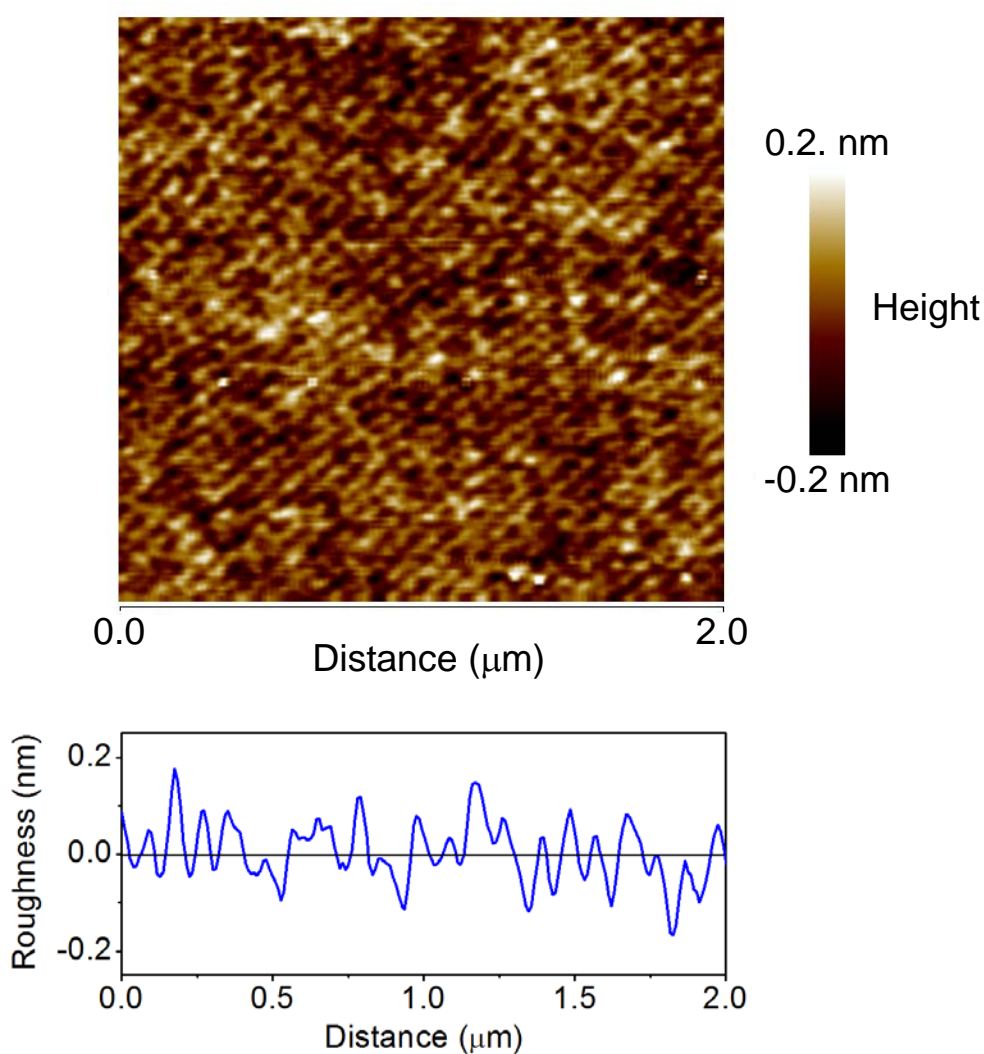

**Figure S1.** AFM image and surface profile of a representative a-Al<sub>2</sub>O<sub>3</sub> buffer layer produced by PLD in vacuum.
